# Supplementary material for: Ion density-enhanced electrostatic precipitation using high voltage nanosecond pulses
Source: Royal Society of Chemistry journal article supplement (doi:10.1039/d3va00148b), 2023-01-01
Supplement: d3va00148b1.pdf [file d3va00148b1.pdf]

Supplemental Document for

**Ion Density-enhanced Electrostatic Precipitation using High Voltage Nanosecond Pulses**

*Boxin Zhang<sup>4</sup>, Indu Aravind<sup>1</sup>, Sisi Yang<sup>1</sup>, Sizhe Weng<sup>3</sup>, Bofan Zhao<sup>3</sup>, Grace Johnson<sup>5,6</sup>, Lucas Brown<sup>5,6</sup>, Jason Olfert<sup>7</sup>, Heejung Jung<sup>5,6</sup>, and Stephen B. Cronin<sup>1, 2, 3</sup>*

<sup>1</sup>Department of Physics and Astronomy, <sup>2</sup>Department of Chemistry, <sup>3</sup>Ming Hsieh Department of Electrical Engineering, <sup>4</sup>Mork Family Department of Chemical Engineering and Materials Science, University of Southern California, Los Angeles, CA 90089, USA

<sup>5</sup>Department of Mechanical Engineering, <sup>6</sup>College of Engineering-Center for Environmental Research and Technology (CE-CERT), University of California, Riverside, Riverside, CA 92521, USA, <sup>7</sup>Department of Mechanical Engineering, University of Alberta, Edmonton, Alberta, Canada

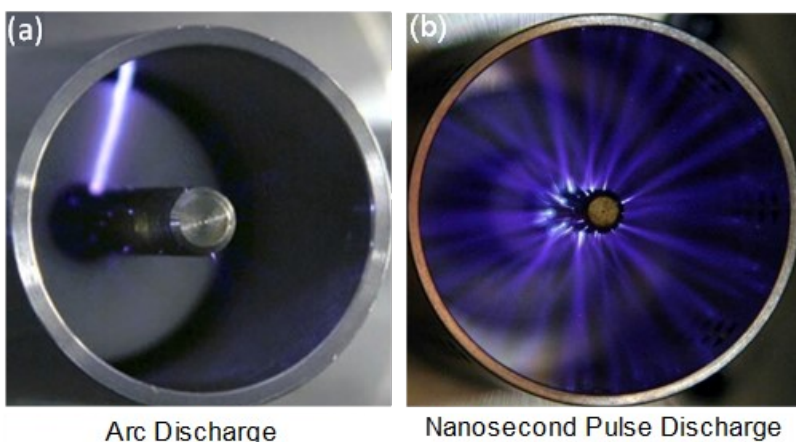

**Figure S1.** Photograph illustrating the *arcing threshold* in a cylindrical electrostatic precipitator.

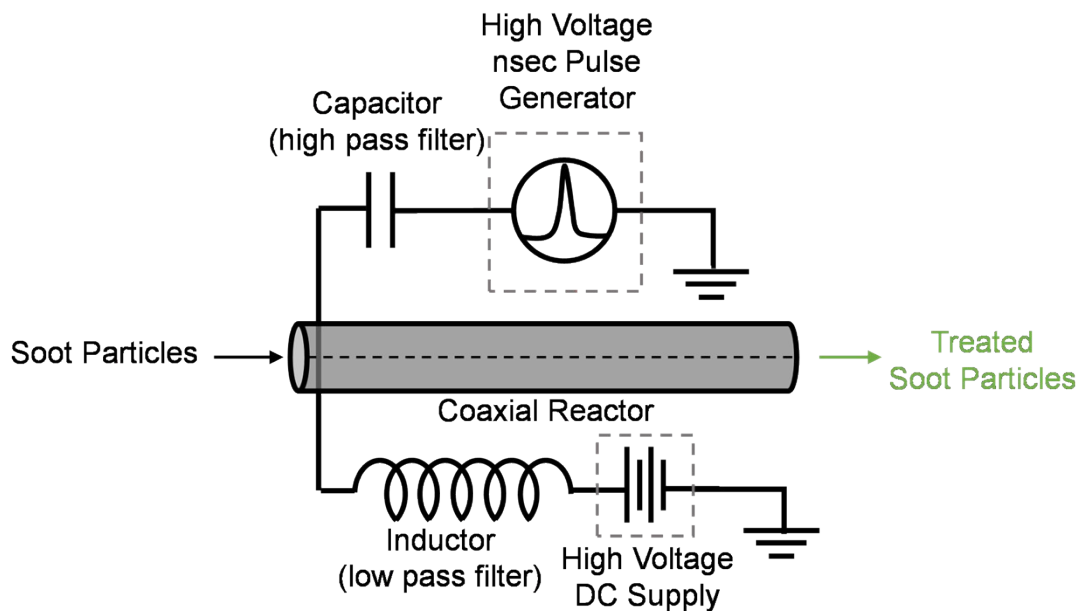

18

19 **Figure S2.** Schematic circuit diagram for nanosecond high voltage pulse generator and high voltage DC  
 20 power supply.

21 **S1. Measurement of soot effective density**

22 The relationship between particle size and particle mass can be expressed as:

$$m = kd_m^{D_m} \tag{S1}$$

23 where  $m$  is the mass of a particle,  $k$  is the mass-mobility pre-factor,  $d_m$  is the particle mobility  
 24 diameter, and  $D_m$  is the mass-mobility exponent. The relationship can also be expressed as the  
 25 ‘effective density’,  $\rho_{eff}$ , defined as

$$\rho_{eff} \equiv \frac{m}{\pi d_m^3/6} = \left(\frac{6k}{\pi}\right) d_m^{D_m-3} \tag{S2}$$

26 The effective density of the soot particles was measured using a DMA (TSI Model 3080),  
 27 which classifies particles by electrical mobility, in series with a centrifugal particle mass analyzer  
 28 (CPMA, Cambustion Ltd), which classifies particles by mass-to-charge ratio, and a CPC (TSI  
 29 Model 3750), as shown in Figure 1 of the manuscript.

30 In this system, the DMA is set to select a single mobility and the CPMA is stepped through a  
31 range of masses while a CPC is used to measure the concentration of particles exiting the CPMA.  
32 The resulting particle number-mass distribution is fit with a lognormal distribution to determine  
33 the median particle mass for the given DMA mobility diameter. Repeating this procedure over a  
34 range of DMA set points gives the relationship between the mass and mobility of the particles (or  
35 the effective density as a function of mobility diameter).

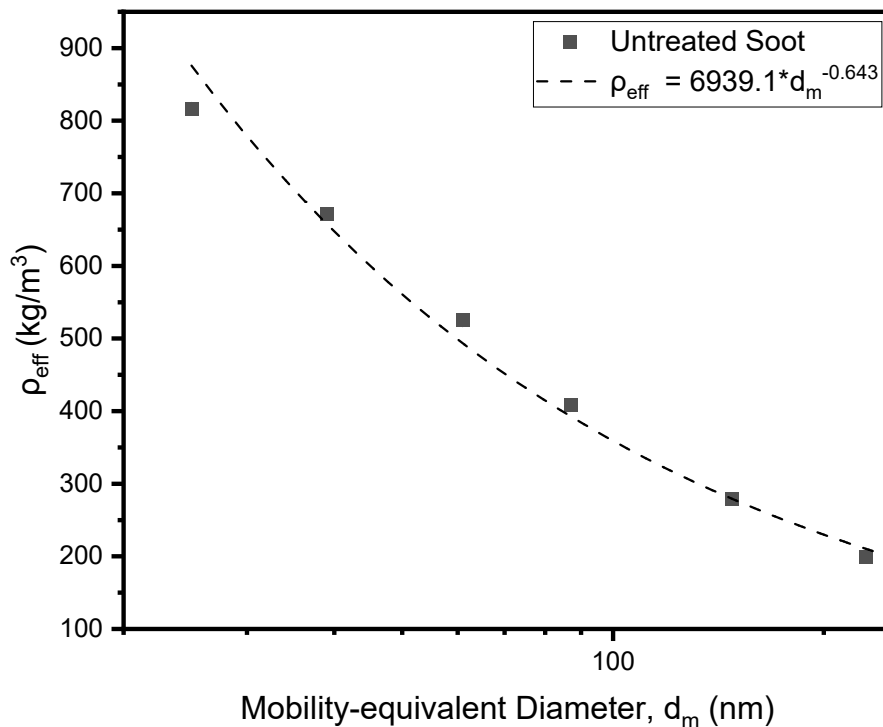

36  
37 **Figure S3.** Particle effective density of the untreated soot.

38  
39 Figure S3 shows particle effective density of the baseline soot. The results show an effective  
40 density profile for the ethylene diffusion flame soot. The effective densities and mass-mobility  
41 exponents (2.36) of the soot measured here are typical of soot from other combustion sources (see  
42 Olfert and Rogak (2019)<sup>1</sup> for a review of soot effective densities from automotive engines, gas  
43 turbines and a wide range of premixed and non-premixed burners).

44 The particle number-size distributions measured by the SMPS can then be converted to  
45 particle mass-size distributions using the effective density relationship. The mass-size distributions  
46 are then integrated to calculate the total mass concentration so that the remediation efficiency on  
47 a mass basis is found.

48

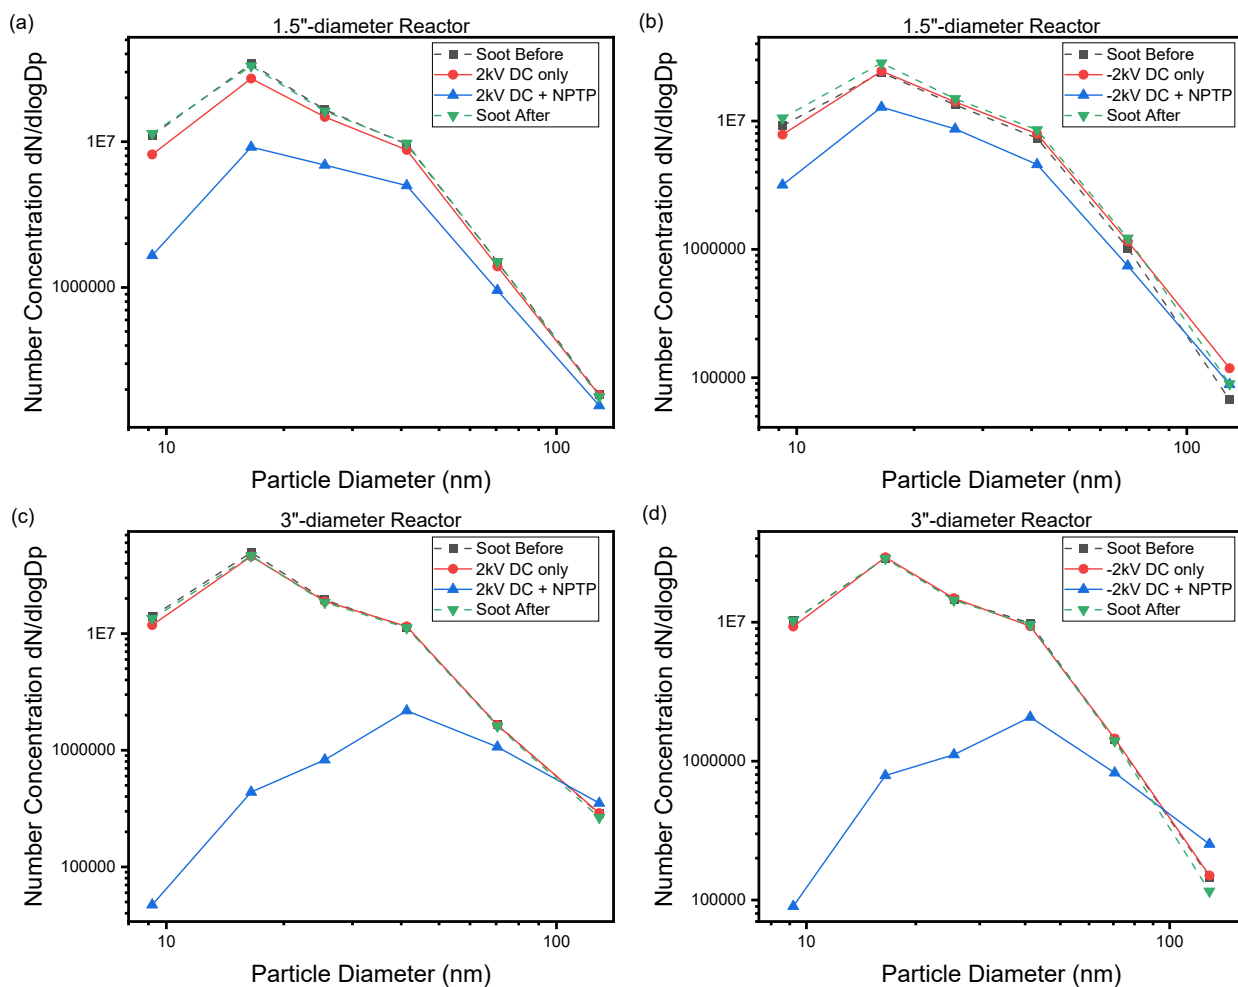

49

50 **Figure S4.** Number concentration vs. Particle diameter plots with (a, b) a 1.5"-diameter reactor, and (c, d)  
51 a 3"-diameter reactor. (a) and (c) correspond to positive DC voltage and (b) and (d) correspond to negative  
52 DC voltage.

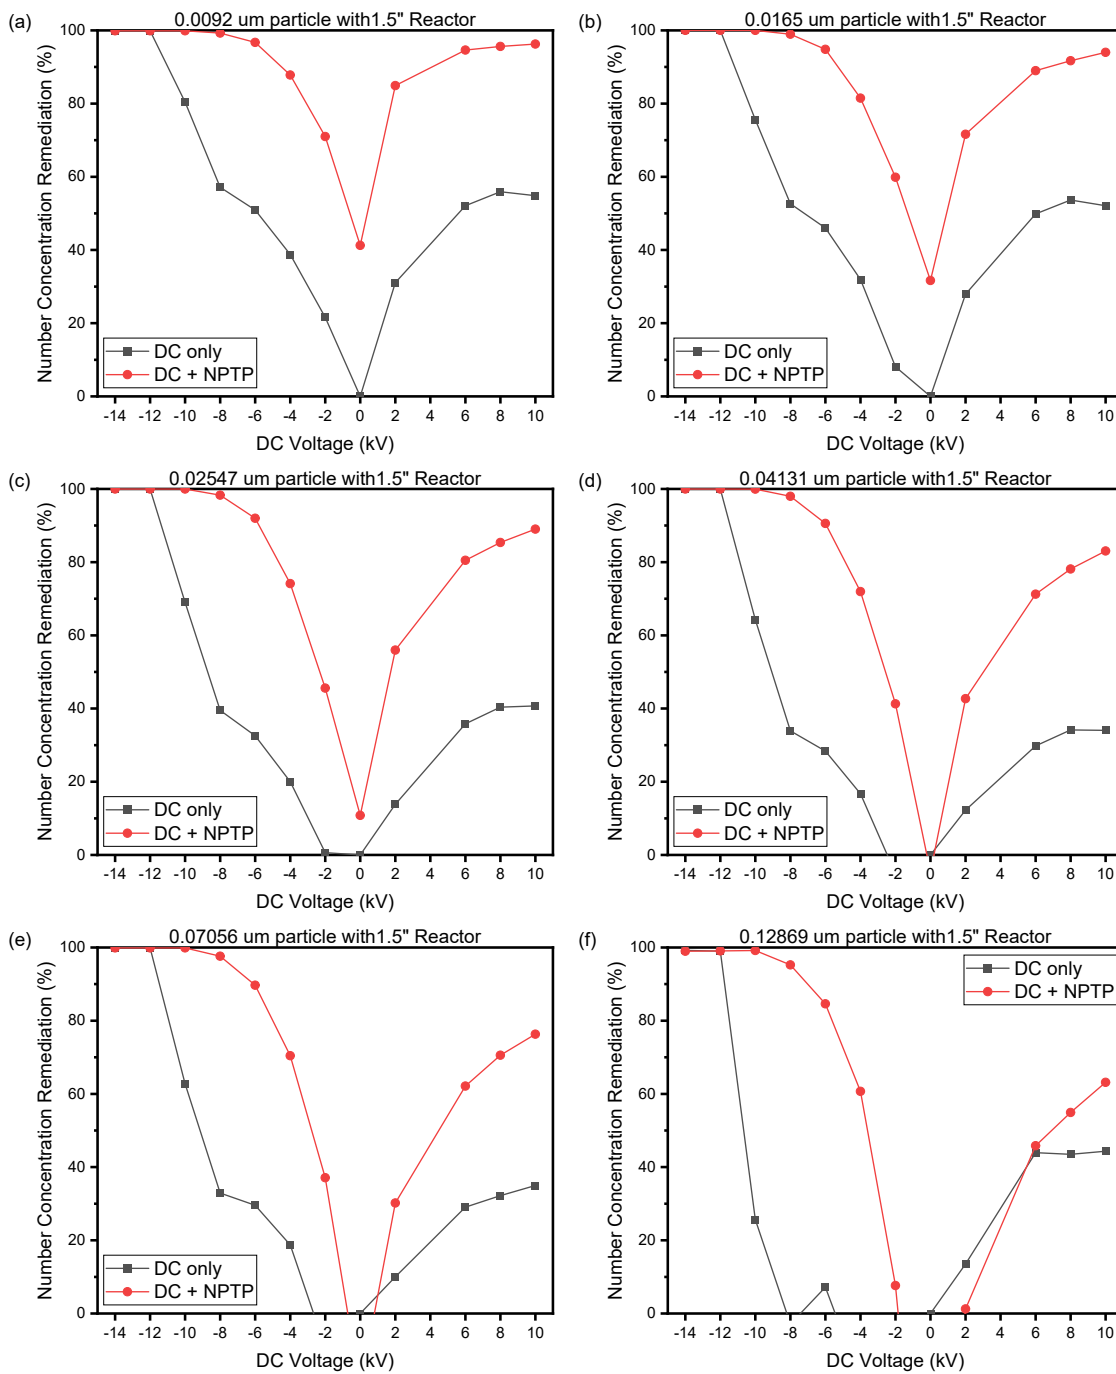

53

54 **Figure S5.** Number concentration remediation percentage for each diameter of nanoparticles with the 1.5"-  
 55 diameter reactor.

56

57

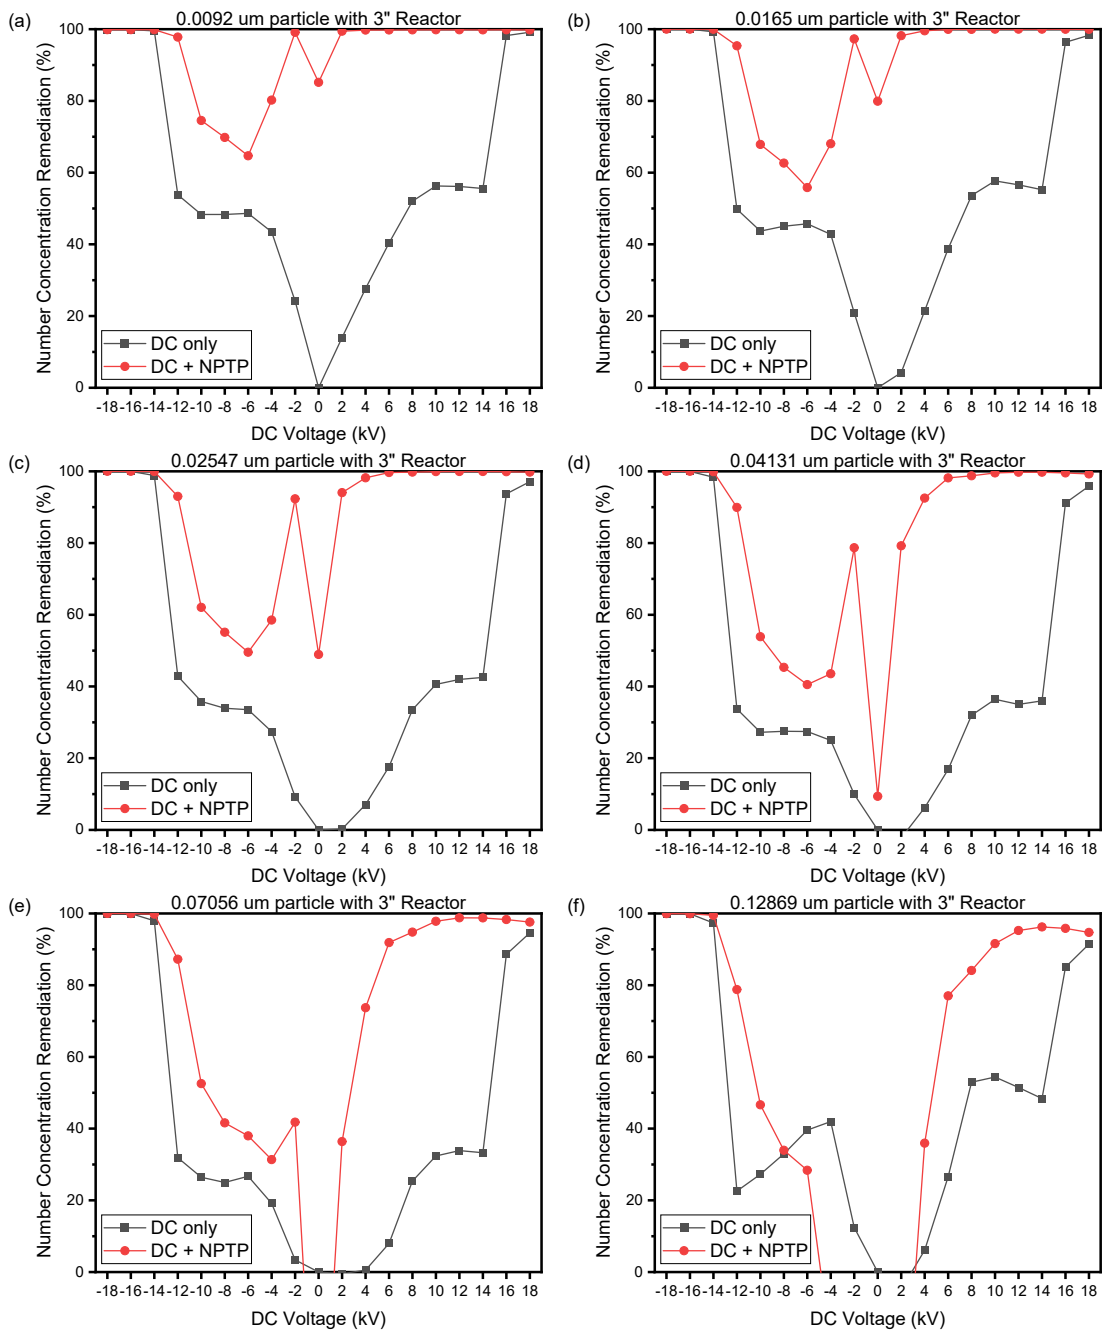

58

59 **Figure S6.** Number concentration remediation percentage for each diameter of nanoparticles with the 3"-  
 60 diameter reactor.

61

62

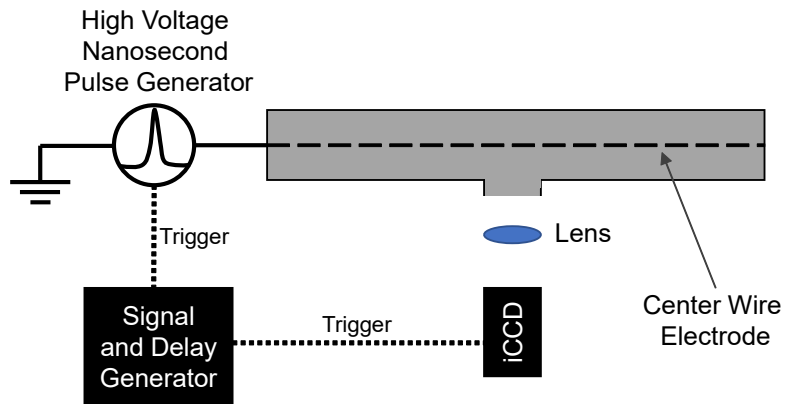

63

64 **Figure S7.** Illustration of iCCD camera and nsec pulse generator configuration for high speed integrated  
 65 imaging.

66

67 **References**

- 68 1. Olfert, J. and S. Rogak, *Universal relations between soot effective density and primary*  
69 *particle size for common combustion sources*. *Aerosol Science and Technology*, 2019.  
70 **53(5)**: p. 485-492.

71
